# Supplementary material for: SARS-CoV-2 Delta and Omicron variants resist spike cleavage by human airway trypsin-like protease
Source: JCI journal article supplement (doi:10.1172/jci174304), 2024-09-16

Original images of gels and western blots

Figure 5A

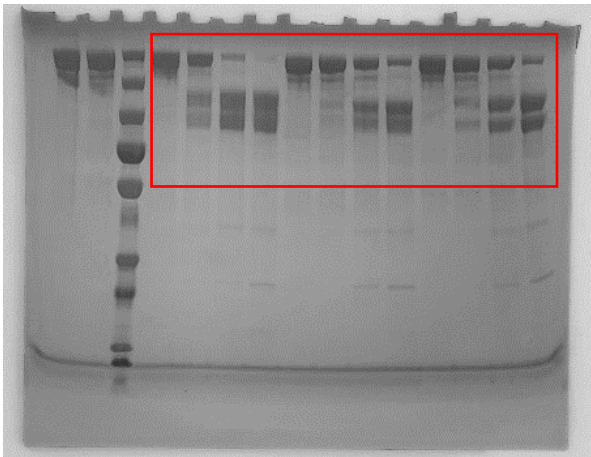

Figure 5B (Anti-Spike S1)

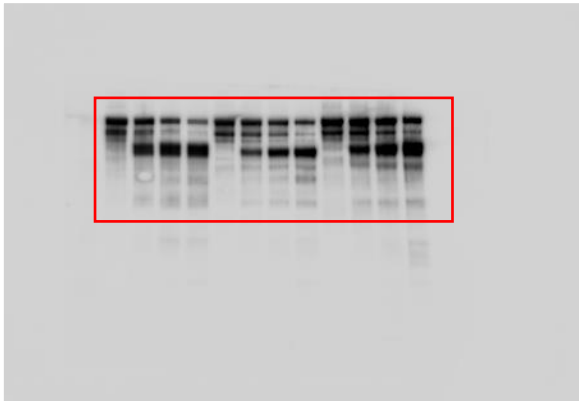

Figure 5C (Anti-Spike S2)

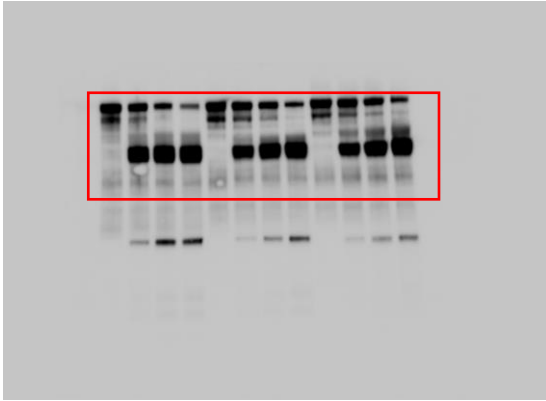

Figure 5D Up (Anti-Spike S1)

Ancestral

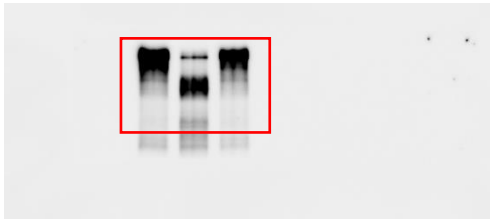

Delta

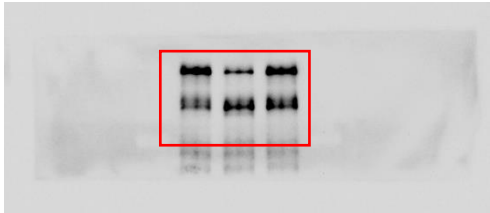

Omicron BA.1

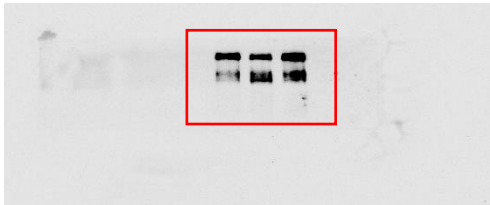

Figure 5D Bottom (Anti-nucleocapsid protein)

Ancestral

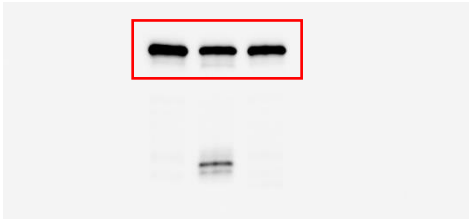

Delta

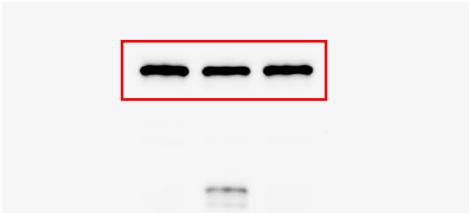

Omicron BA.1

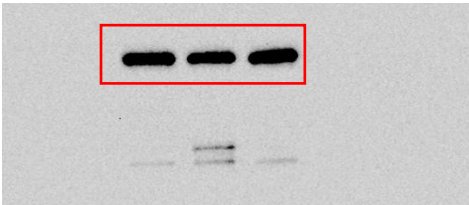

Original images of gels and western blots

Supplementary 3

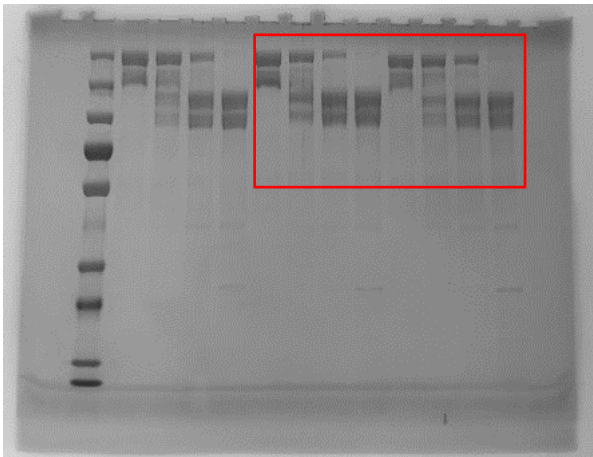

Supplementary 4

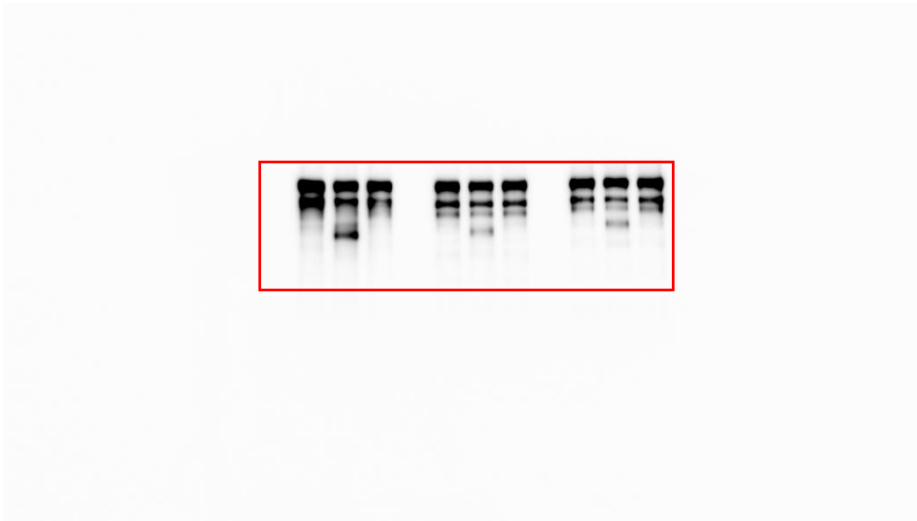

Supplement: sd5 [file 5]
